# Supplementary material
Source: publisher site journal article supplement (https://www.spandidos-publications.com/1429/downloadSupplementary)

Figure S1. Representative immunofluorescence images of CD8<sup>+</sup> and CD4<sup>+</sup> T cells in the brain of saline (left panels) and 1-methyl-4-phenyl-1,2,3,6-tetrahydropyridine (Right panels) treated mice. (A) CD8<sup>+</sup> and (B) CD4<sup>+</sup> T cells. Scale bars, 25  $\mu$ m.

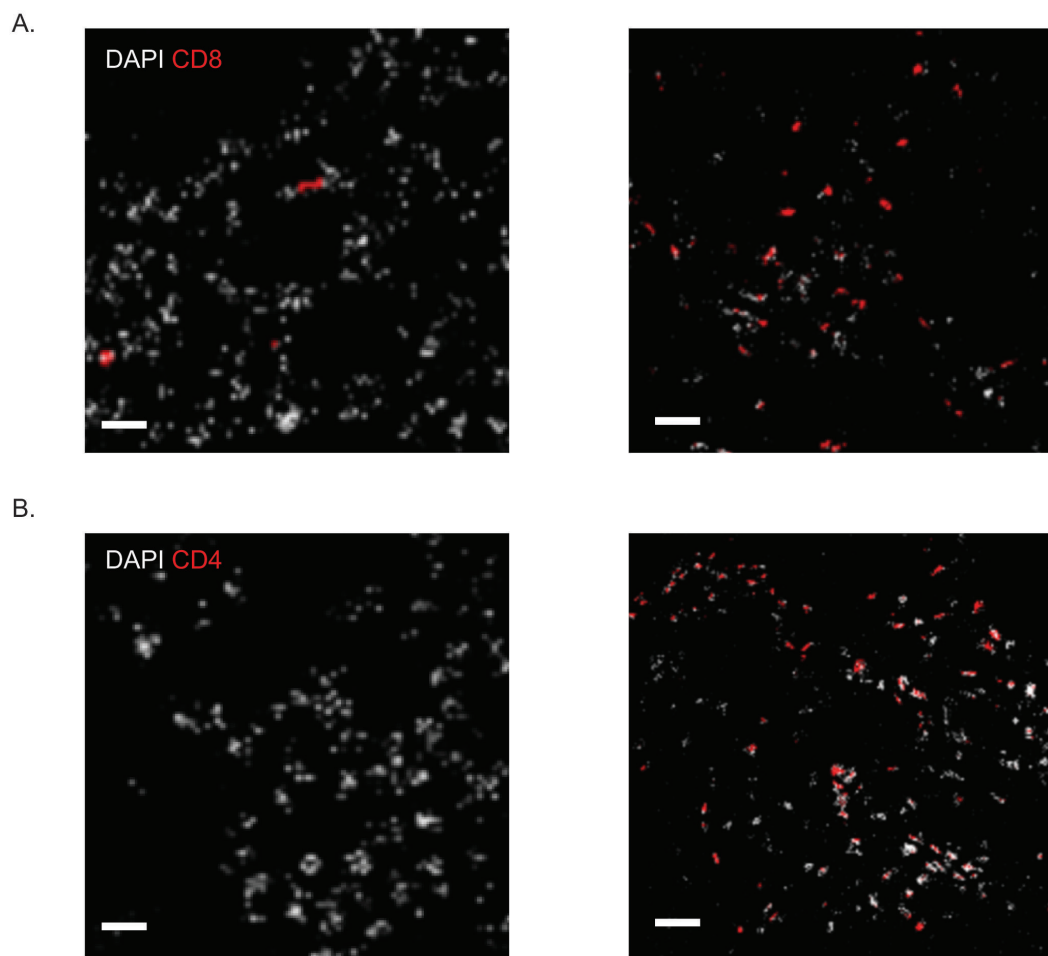

Figure S2. Representative immunofluorescence image of TH<sup>+</sup> cells (stained blue) in MPTP-treated mice during the blocking of ICAM1 or CD11a. Scale bars, 20  $\mu$ m. ICAM1, intercellular adhesion molecule 1; MPTP, 1-methyl-4-phenyl-1,2,3,6-tetrahydropyridine; TH, tyrosine hydroxylase;  $\alpha$ -ICAM1, anti-mouse ICAM1 antibodies;  $\alpha$ -CD11a, anti-mouse CD11a antibodies.

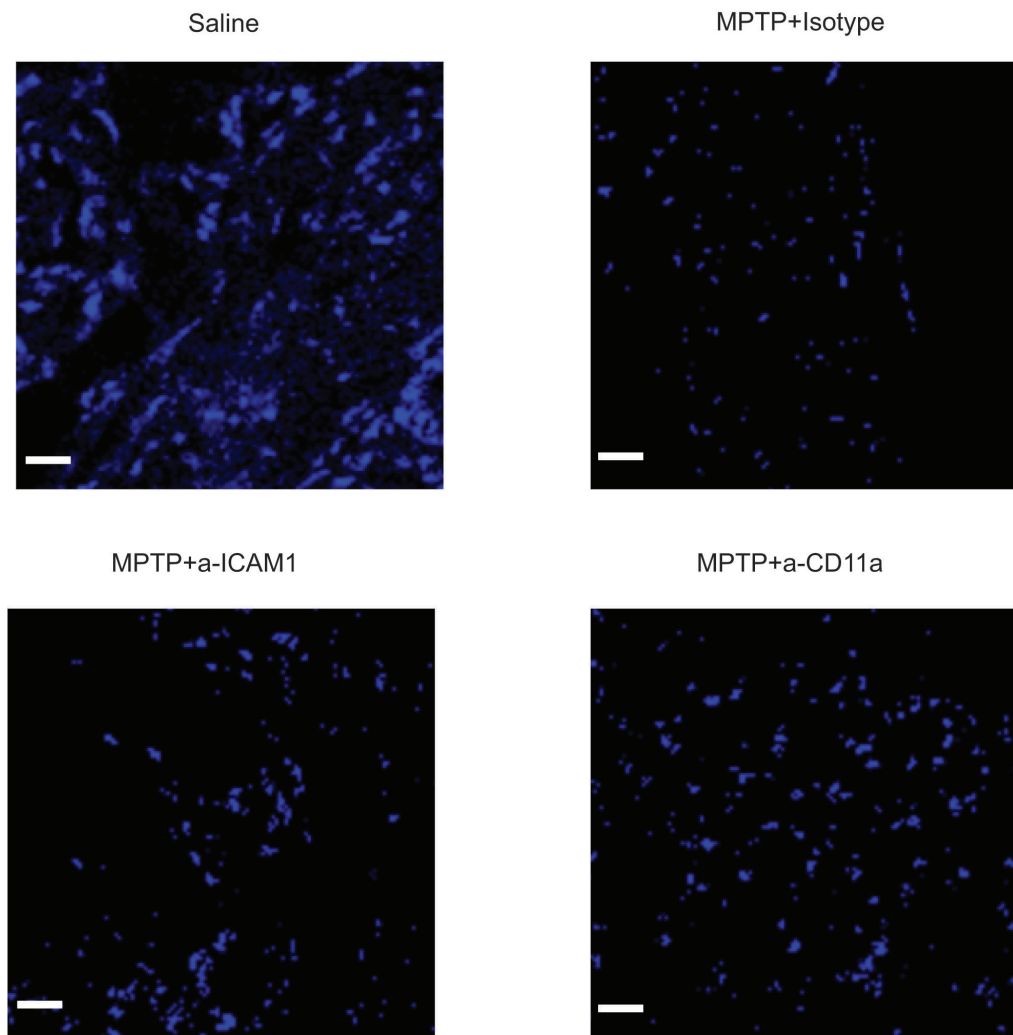

Supplement: Supplementary file 1 [file downloadSupplementary]
